# Supplementary material for: Gaseous Air Pollutants and Respirable Crystalline Silica Inside and Outside Homes at Brick Kilns in Bhaktapur, Kathmandu Valley, Nepal
Source: MDPI journal article supplement (doi:10.3390/ijerph191912431), 2022-09-29
Supplement: s1 [file s1]

## Supplementary Materials:

# Gaseous Air Pollutants and Respirable Crystalline Silica Inside and Outside Homes at Brick Kilns in Bhaktapur, Kathmandu Valley, Nepal

John D. Beard <sup>1,\*</sup>, Steven M. Thygeson <sup>1</sup>, Alisandra Olivares <sup>1</sup>, Jaxson E. Tadjé <sup>1</sup>, Selah Willis <sup>1</sup> and James D. Johnston <sup>1</sup>

<sup>1</sup> Department of Public Health, Brigham Young University, Provo, UT 84602, USA

\* Correspondence: john\_beard@byu.edu; Tel.: +1-801-422-7491

**Table S1.** Associations between characteristics and having CO<sub>2</sub> air concentrations measured inside homes above the LDL at brick kilns in Bhaktapur, Kathmandu Valley, Nepal, May 2018.

| Characteristic                                    | CO <sub>2</sub> , ppm |                     |                          |                              | Exact <i>p</i> -Value <sup>a</sup> |
|---------------------------------------------------|-----------------------|---------------------|--------------------------|------------------------------|------------------------------------|
|                                                   | Below<br>LDL, n (%)   | Above<br>LDL, n (%) | Exact<br>OR <sup>a</sup> | Exact 95%<br>CI <sup>a</sup> |                                    |
| Kiln number                                       |                       |                     |                          |                              |                                    |
| 1                                                 | 3 (27)                | 1 (20)              | 1.00                     | Reference                    |                                    |
| 2                                                 | 3 (27)                | 1 (20)              | 1.00                     | 0.01, 104.37                 |                                    |
| 3                                                 | 3 (27)                | 1 (20)              | 1.00                     | 0.01, 104.37                 |                                    |
| 4                                                 | 2 (18)                | 2 (40)              | 2.60                     | 0.08, 235.00                 | 1.00                               |
| Type of home                                      |                       |                     |                          |                              |                                    |
| Worker                                            | 6 (55)                | 2 (40)              | 1.00                     | Reference                    |                                    |
| Fire master                                       | 5 (45)                | 3 (60)              | 1.73                     | 0.14, 28.99                  | 1.00                               |
| Size of house, 50 feet <sup>2</sup>               |                       |                     | 1.13                     | 0.23, 5.92                   | 0.88                               |
| Missing                                           | 1                     | 1                   |                          |                              |                                    |
| Size of house, m <sup>2</sup>                     |                       |                     | 1.03                     | 0.72, 1.47                   | 0.88                               |
| Missing                                           | 1                     | 1                   |                          |                              |                                    |
| How long lived in house, two months               |                       |                     | 0.05                     | < 0.01, 1.00                 | 0.05                               |
| Missing                                           | 1                     | 1                   |                          |                              |                                    |
| How many people live in house                     |                       |                     | 1.17                     | 0.66, 2.15                   | 0.63                               |
| Missing                                           | 3                     | 1                   |                          |                              |                                    |
| Occupant density, 10 residents/100 m <sup>2</sup> |                       |                     | 1.13                     | 0.86, 1.50                   | 0.45                               |
| Missing                                           | 3                     | 2                   |                          |                              |                                    |
| How many children 0-18 years-old live in house    |                       |                     |                          |                              |                                    |
| 0                                                 | 6 (60)                | 3 (75)              | 1.00                     | Reference                    |                                    |
| 1-3                                               | 4 (40)                | 1 (25)              | 0.52                     | 0.01, 9.80                   | 1.00                               |
| Missing                                           | 1                     | 1                   |                          |                              |                                    |
| How many children under 6 years-old live in house |                       |                     |                          |                              |                                    |
| 0                                                 | 6 (67)                | 3 (75)              | 1.00                     | Reference                    |                                    |

| Characteristic                                                      | CO <sub>2</sub> , ppm |                     |                          |                              | Exact <i>p</i> -Value <sup>a</sup> |
|---------------------------------------------------------------------|-----------------------|---------------------|--------------------------|------------------------------|------------------------------------|
|                                                                     | Below<br>LDL, n (%)   | Above<br>LDL, n (%) | Exact<br>OR <sup>a</sup> | Exact 95%<br>CI <sup>a</sup> |                                    |
| 1-3                                                                 | 3 (33)                | 1 (25)              | 0.69                     | 0.01, 14.34                  | 1.00                               |
| Missing                                                             | 2                     | 1                   |                          |                              |                                    |
| Primary fuel used for cooking                                       |                       |                     |                          |                              |                                    |
| Gas only                                                            | 3 (27)                | 0 (0)               | 0.42 <sup>b</sup>        | 0.00, 3.35                   |                                    |
| Wood only                                                           | 5 (45)                | 4 (100)             | 1.00                     | Reference                    |                                    |
| Other <sup>c</sup>                                                  | 3 (27)                | 0 (0)               | 0.42 <sup>b</sup>        | 0.00, 3.35                   | 0.39                               |
| Missing                                                             | 0                     | 1                   |                          |                              |                                    |
| Type of heating source in the home                                  |                       |                     |                          |                              |                                    |
| Electricity                                                         | 5 (63)                | 3 (75)              | 1.00                     | Reference                    |                                    |
| Other <sup>d</sup> or none                                          | 3 (38)                | 1 (25)              | 0.58                     | 0.01, 12.43                  | 1.00                               |
| Missing                                                             | 3                     | 1                   |                          |                              |                                    |
| Type of non-electric light source in the home                       |                       |                     |                          |                              |                                    |
| Candle                                                              | 6 (60)                | 1 (25)              | 0.12                     | < 0.01, 4.05                 |                                    |
| Generator                                                           | 3 (30)                | 1 (25)              | 0.22                     | < 0.01, 8.85                 |                                    |
| Other <sup>e</sup> or none                                          | 1 (10)                | 2 (50)              | 1.00                     | Reference                    | 0.25                               |
| Missing                                                             | 1                     | 1                   |                          |                              |                                    |
| Any smokers living in the home                                      |                       |                     |                          |                              |                                    |
| No                                                                  | 5 (45)                | 0 (0)               | 1.00                     | Reference                    |                                    |
| Yes                                                                 | 6 (55)                | 4 (100)             | 3.51 <sup>b</sup>        | 0.49, ∞                      | 0.15                               |
| Missing                                                             | 0                     | 1                   |                          |                              |                                    |
| How many smokers living in the home                                 |                       |                     |                          |                              |                                    |
| 0                                                                   | 5 (55)                | 0 (0)               | 1.00                     | Reference                    |                                    |
| 1-2                                                                 | 2 (22)                | 2 (67)              | 3.77 <sup>b</sup>        | 0.40, ∞                      |                                    |
| 3-4                                                                 | 2 (22)                | 1 (33)              | 1.67 <sup>b</sup>        | 0.09, ∞                      | 0.27                               |
| Missing                                                             | 2                     | 2                   |                          |                              |                                    |
| How many smokers living in the home regularly smoke inside the home |                       |                     |                          |                              |                                    |
| 0-1                                                                 | 4 (80)                | 2 (50)              | 1.00                     | Reference                    |                                    |
| 2-4                                                                 | 1 (20)                | 2 (50)              | 3.39                     | 0.11, 293.83                 | 0.81                               |
| Missing                                                             | 6                     | 1                   |                          |                              |                                    |

Abbreviations: CO<sub>2</sub>, carbon dioxide; CI, confidence interval; LDL, lower detection limit; OR, odds ratio. <sup>a</sup> Estimated using simple (i.e., unadjusted) exact unconditional logistic regression models. <sup>b</sup> Median unbiased estimate. <sup>c</sup> Includes coal and wood, gas and wood. <sup>d</sup> Includes lightbulb, line cable. <sup>e</sup> Includes candle and torch, fuel.

**Table S2.** Associations between characteristics and SiO<sub>2</sub> (quartz) air concentrations measured inside homes at brick kilns in Bhaktapur, Kathmandu Valley, Nepal, May 2018.

| Characteristic                                    | SiO <sub>2</sub> (quartz), µg/m <sup>3</sup> |                     |                   |                         |                      |
|---------------------------------------------------|----------------------------------------------|---------------------|-------------------|-------------------------|----------------------|
|                                                   | Below<br>LDL, n (%)                          | Above<br>LDL, n (%) | GM <sup>a</sup>   | 95% CI <sup>a</sup>     | p-Value <sup>a</sup> |
| Kiln number                                       |                                              |                     |                   |                         |                      |
| 1                                                 | 0 (0)                                        | 4 (40)              | 7.77              | 4.25, 14.21             |                      |
| 2                                                 | 1 (17)                                       | 3 (30)              | 7.70              | 4.12, 14.39             |                      |
| 3                                                 | 2 (33)                                       | 2 (20)              | 5.65              | 2.89, 11.07             |                      |
| 4                                                 | 3 (50)                                       | 1 (10)              | 4.27              | 1.95, 9.38              | 0.60                 |
| Type of home                                      |                                              |                     |                   |                         |                      |
| Worker                                            | 3 (50)                                       | 5 (50)              | 5.62              | 3.53, 8.94              |                      |
| Fire master                                       | 3 (50)                                       | 5 (50)              | 7.17              | 4.53, 11.35             | 0.45                 |
| Size of house, 50 feet <sup>2</sup>               |                                              |                     | 1.03 <sup>b</sup> | 0.57, 1.86 <sup>b</sup> | 0.92                 |
| Missing                                           | 0                                            | 2                   |                   |                         |                      |
| Size of house, m <sup>2</sup>                     |                                              |                     | 1.01 <sup>b</sup> | 0.89, 1.14 <sup>b</sup> | 0.93                 |
| Missing                                           | 0                                            | 2                   |                   |                         |                      |
| How long lived in house, two months               |                                              |                     | 1.08 <sup>b</sup> | 0.99, 1.17 <sup>b</sup> | 0.09                 |
| Missing                                           | 0                                            | 2                   |                   |                         |                      |
| How many people live in house                     |                                              |                     | 1.14 <sup>b</sup> | 0.90, 1.44 <sup>b</sup> | 0.28                 |
| Missing                                           | 0                                            | 4                   |                   |                         |                      |
| Occupant density, 10 residents/100 m <sup>2</sup> |                                              |                     | 1.00 <sup>b</sup> | 0.87, 1.14 <sup>b</sup> | 0.95                 |
| Missing                                           | 0                                            | 5                   |                   |                         |                      |
| How many children 0-18 years-old live in house    |                                              |                     |                   |                         |                      |
| 0                                                 | 5 (83)                                       | 4 (50)              | 5.72              | 3.33, 9.80              |                      |
| 1-3                                               | 1 (17)                                       | 4 (50)              | 6.11              | 3.26, 11.44             | 0.87                 |
| Missing                                           | 0                                            | 2                   |                   |                         |                      |
| How many children under 6 years-old live in house |                                              |                     |                   |                         |                      |
| 0                                                 | 5 (83)                                       | 4 (57)              | 5.58              | 3.12, 9.98              |                      |
| 1-3                                               | 1 (17)                                       | 3 (43)              | 5.44              | 2.55, 11.61             | 0.96                 |
| Missing                                           | 0                                            | 3                   |                   |                         |                      |
| Primary fuel used for cooking                     |                                              |                     |                   |                         |                      |
| Gas only                                          | 1 (17)                                       | 2 (22)              | 6.98              | 3.13, 15.57             |                      |
| Wood only                                         | 4 (67)                                       | 5 (56)              | 6.06              | 3.70, 9.92              |                      |
| Other <sup>c</sup>                                | 1 (17)                                       | 2 (22)              | 6.15              | 2.74, 13.78             | 0.96                 |
| Missing                                           | 0                                            | 1                   |                   |                         |                      |
| Type of heating source in the home                |                                              |                     |                   |                         |                      |
| Electricity                                       | 5 (100)                                      | 3 (43)              | 4.64              | 2.86, 7.53              |                      |
| Other <sup>d</sup> or none                        | 0 (0)                                        | 4 (57)              | 9.74              | 5.70, 16.66             | 0.04                 |
| Missing                                           | 1                                            | 3                   |                   |                         |                      |
| Type of non-electric light source in the home     |                                              |                     |                   |                         |                      |
| Candle                                            | 3 (60)                                       | 4 (44)              | 6.19              | 3.66, 10.48             |                      |
| Generator                                         | 0 (0)                                        | 4 (44)              | 7.77              | 4.13, 14.62             |                      |

| Characteristic                                                         | SiO <sub>2</sub> (quartz), µg/m <sup>3</sup> |                     |                 |                     |                      |
|------------------------------------------------------------------------|----------------------------------------------|---------------------|-----------------|---------------------|----------------------|
|                                                                        | Below<br>LDL, n (%)                          | Above<br>LDL, n (%) | GM <sup>a</sup> | 95% CI <sup>a</sup> | p-Value <sup>a</sup> |
| Other <sup>c</sup> or none                                             | 2 (40)                                       | 1 (11)              | 6.21            | 2.65, 14.57         | 0.85                 |
| Missing                                                                | 1                                            | 1                   |                 |                     |                      |
| Any smokers living in the home                                         |                                              |                     |                 |                     |                      |
| No                                                                     | 1 (17)                                       | 4 (44)              | 8.14            | 4.53, 14.60         |                      |
| Yes                                                                    | 5 (83)                                       | 5 (56)              | 5.46            | 3.41, 8.73          | 0.29                 |
| Missing                                                                | 0                                            | 1                   |                 |                     |                      |
| How many smokers living in the home                                    |                                              |                     |                 |                     |                      |
| 0                                                                      | 1 (25)                                       | 4 (50)              | 8.32            | 5.30, 13.07         |                      |
| 1-2                                                                    | 2 (50)                                       | 2 (25)              | 4.40            | 2.47, 7.83          |                      |
| 3-4                                                                    | 1 (25)                                       | 2 (25)              | 9.06            | 5.01, 16.39         | 0.14                 |
| Missing                                                                | 2                                            | 2                   |                 |                     |                      |
| How many smokers living in the home regularly<br>smoke inside the home |                                              |                     |                 |                     |                      |
| 0-1                                                                    | 3 (75)                                       | 3 (60)              | 5.93            | 3.00, 11.71         |                      |
| 2-4                                                                    | 1 (25)                                       | 2 (40)              | 5.25            | 2.14, 12.83         | 0.83                 |
| Missing                                                                | 2                                            | 5                   |                 |                     |                      |

Abbreviations: CI, confidence interval; GM, geometric mean; LDL, lower detection limit; SiO<sub>2</sub>, crystalline silica. <sup>a</sup> Estimated using simple (i.e., unadjusted) Tobit regression models of the natural logarithm transformed values. <sup>b</sup> Exponentiated regression coefficient and 95% CI (i.e., GM SiO<sub>2</sub> [quartz] concentration ratio for a specified change in the independent variable or  $\exp(\beta) - 1$  = percent change in GM SiO<sub>2</sub> [quartz] concentration for a specified change in the independent variable). <sup>c</sup> Includes coal and wood, gas and wood. <sup>d</sup> Includes lightbulb, line cable. <sup>e</sup> Includes candle and torch, fuel.
